# Supplementary material for: Identifying Ecological Restoration Zones Based on Ecological Security Patterns: A Case Study of a Resource-Transitioning District
Source: Research Square preprint supplement (doi:10.21203/rs.3.rs-7072536/v1), 2025-07-17
Supplement: Supplementary file 1 [file 66f0a3c363101d522be50ba2.docx]

***Supplementary Materials***

S1 Parameters used for Water Yield calculation

Table 1 Biophysical table.

| description | lucode | root_depth | Kc | LULC_veg |
| --- | --- | --- | --- | --- |
| Cropland | 1 | 2000 | 0.65 | 1 |
| Forestland | 2 | 5000 | 1 | 1 |
| Gardenland | 3 | 3000 | 0.7 | 1 |
| Grassland | 4 | 2600 | 0.85 | 1 |
| Construction | 5 | 1 | 0.3 | 0 |
| Transportation | 6 | 1 | 0.85 | 0 |
| Water | 7 | 1 | 1 | 0 |
| Unused land | 8 | 1 | 0.2 | 0 |

S2 Parameters used for Habitat Quality

Table 2 Threats table.

| max_dist (km) | weight | threat | decay |
| --- | --- | --- | --- |
| 1 | 3 | cropland | linear |
| 5 | 5 | construction | exponential |
| 6 | 2 | transportation | exponential |
| 8 | 5 | unused land | linear |

Table 3 Sensitivity table.

| lulc | habitat | cropland | construction | transportation | unused land |
| --- | --- | --- | --- | --- | --- |
| 1 | 0.3 | 0.3 | 0.5 | 0.2 | 0.25 |
| 2 | 1 | 0.65 | 0.75 | 0.5 | 0.6 |
| 3 | 1 | 0.35 | 0.75 | 0.5 | 0.6 |
| 4 | 0.8 | 0.4 | 0.6 | 0.3 | 0.4 |
| 5 | 0 | 0 | 0 | 0 | 0 |
| 6 | 0 | 0 | 0 | 0 | 0 |
| 7 | 1 | 0.7 | 0.8 | 0.6 | 0.3 |
| 8 | 0 | 0 | 0 | 0 | 0 |

S3 Parameters used for Soil conservation

Table 4 C、P table.

| lulc | C | P |
| --- | --- | --- |
| Cropland | 0.08 | 0.55 |
| Forestland | 0.003 | 1 |
| Gardenland | 0.08 | 0.7 |
| Grassland | 0.004 | 1 |
| Construction | 0.001 | 1 |
| Transportation | 1 | 1 |
| Water | 0 | 0 |
| Unused land | 1 | 1 |

S4 Parameters used for Carbon sequestration

Table 5 Carbon density.

| lulc | name | C_above | C_below | C_soil | C_dead |
| --- | --- | --- | --- | --- | --- |
| 1 | Cropland | 46.5 | 80.7 | 108.4 | 1 |
| 2 | Forestland | 20.36 | 67.5 | 170 | 7.8 |
| 3 | Gardenland | 20.36 | 67.5 | 170 | 7.8 |
| 4 | Grassland | 4.3 | 86.5 | 89.02 | 0 |
| 5 | Construction | 0 | 0 | 71 | 0 |
| 6 | Transportation | 0 | 0 | 0 | 0 |
| 7 | Water | 0 | 0 | 71 | 0 |
| 8 | Unused land | 0.74 | 0.13 | 69.92 | 0 |
